# Supplementary material for: Development of an Anti-Idiotype Aptamer-Based Electrochemical Sensor for a Humanized Therapeutic Antibody Monitoring
Source: MDPI journal article supplement (doi:10.3390/ijms24065277), 2023-03-09
Supplement: s1 [file s1]

## Supporting Information

**Development of electrochemical sensors for a humanized antibody, bevacizumab, employing anti-idiotypic aptamers**

**Madoka Nagata<sup>1, 2</sup>, Jinhee Lee<sup>1</sup>, Taro Saito<sup>2</sup>, Kazunori Ikebukuro<sup>2</sup>, and Koji Sode<sup>1\*</sup>**

**Table S1** DNA Sequences against bevacizumab.

| Name     | Sequence (5' > 3')                                                                                    | Length |
|----------|-------------------------------------------------------------------------------------------------------|--------|
| A14#1    | GCGGTTGGTGGTAGTTACGTTTCGC                                                                             | 24     |
| BivA14#1 | GCGGTTGGTGGTAGTTACGTTTCGCTTTTTTTTTTTTTTTTTTTT<br>TTTTTTTTTTTTTTTTTTTTTTTGGCGGTTGGTGGTAGTTACGTTTC<br>G | 92     |

**Table S2** Composition of artificial serum solution.

| Artificial serum composition     | pH 7.44     |
|----------------------------------|-------------|
| NaCl                             | 123 mM      |
| KCl                              | 3.5 mM      |
| CaCl <sub>2</sub>                | 2.5 mM      |
| MgCl <sub>2</sub>                | 0.7 mM      |
| NaH <sub>2</sub> PO <sub>4</sub> | 1.5 mM      |
| HEPES                            | 10 mM       |
| Bovine serum albumin             | 533 $\mu$ M |

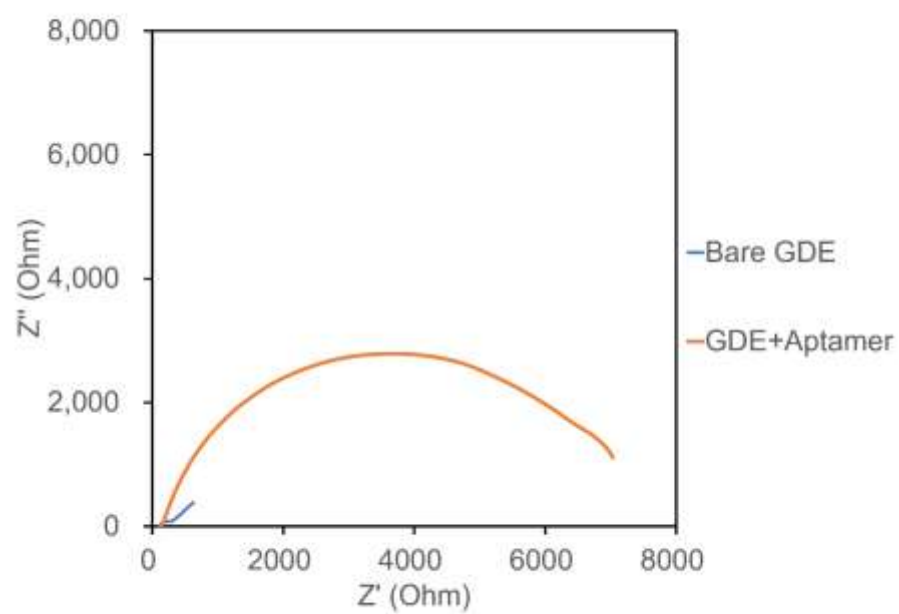

**Figure S1** The Nyquist plots before and after the modification of aptamer

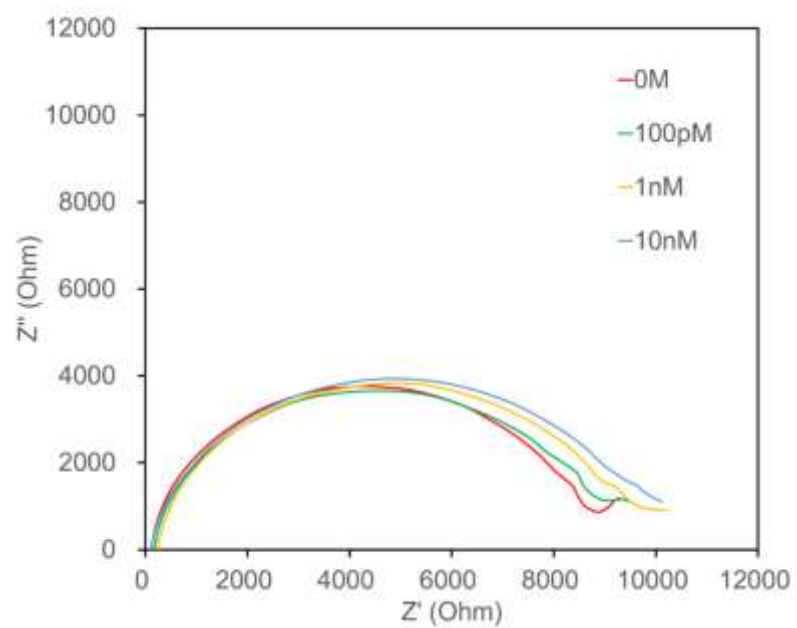

**Figure S2** EIS monitoring of bevacizumab using anti-bevacizumab aptamer A14#1 immobilized electrode with the addition of human IgG kappa chain.

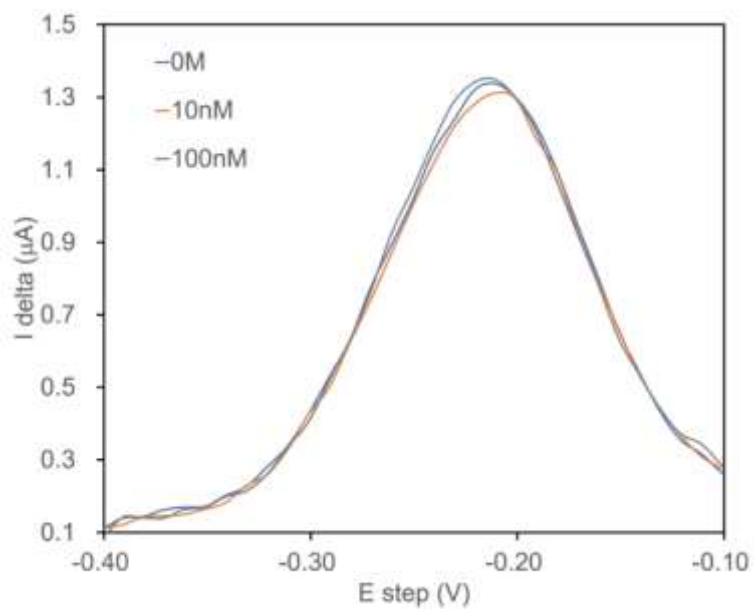

**Figure S3** Square-wave voltammogram of PES-monovalent A14#1 aptamer immobilized sensor at 100Hz in PBS solution with the addition of several concentrations of bevacizumab. SWV scans were conducted as below conditions: -0.4 to -0.1 V, 25 mV amplitude.

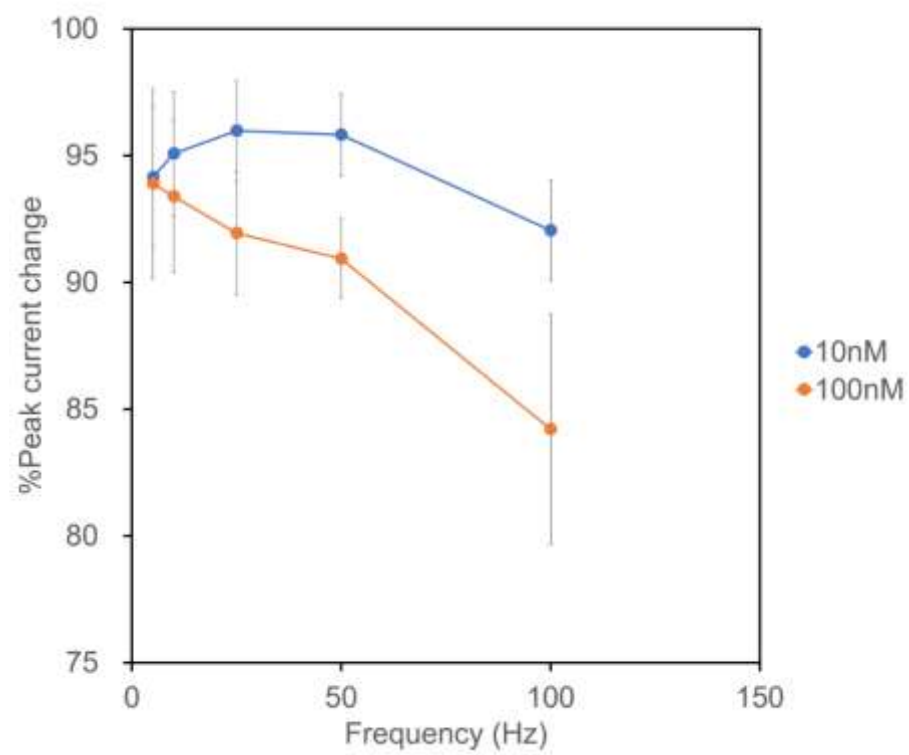

**Figure S4** Peak current change dependencies on the frequency at each bevacizumab concentration. The error bars indicate the standard deviations (N=3).
